# Supplementary material for: MERTK Mediates Intrinsic and Adaptive Resistance to AXL-targeting Agents
Source: Oxford University Press journal article supplement (doi:10.1158/1535-7163.mct-17-1239), 2018-08-09
Supplement: 15357163mct171239-sup-193998_2_supp_4879794_pc22ns.pdf [file 15357163mct171239-sup-193998_2_supp_4879794_pc22ns.pdf]

Figure S5

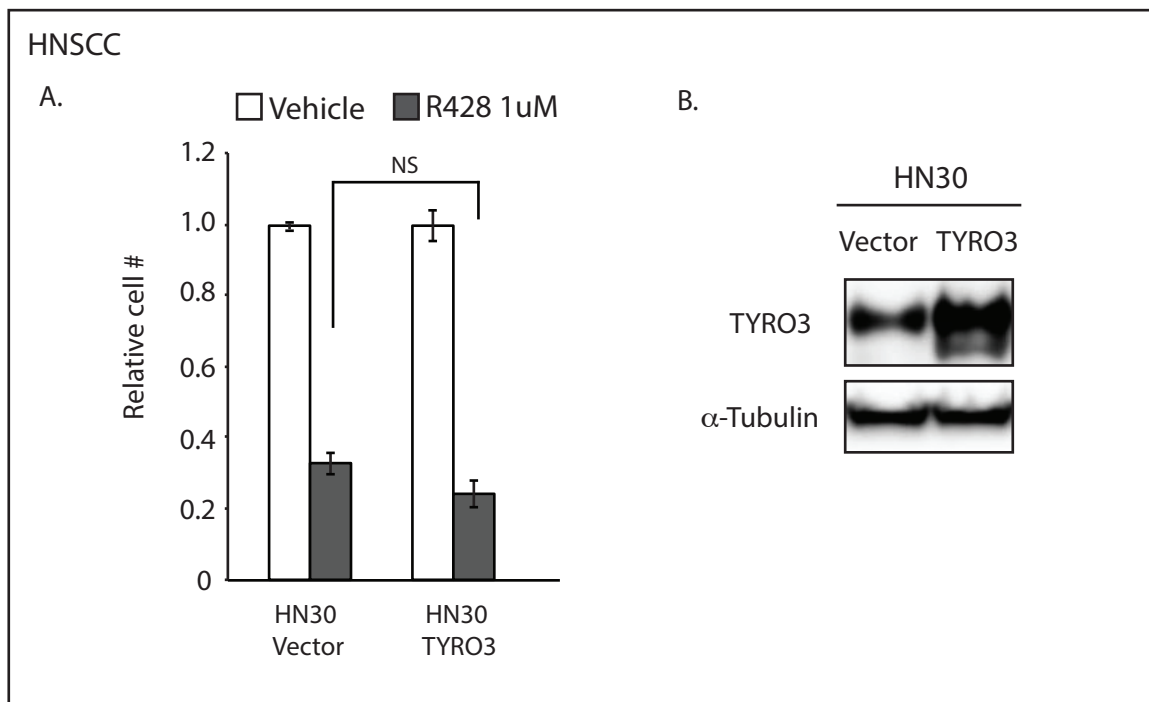

**Figure S5: Overexpression of TYRO3 does not confer resistance to AXL inhibition.** HN30 cells were transfected with pcDNA3.1-TYRO3 expression plasmid (TYRO3) or pcDNA3.1-Vector empty vector control plasmid (Vector). 24 hours after transfection, cells were treated with R428 for an additional 72 hours. (A) Relative cell numbers were determined. (B) Cell lysates were prepared and the indicated proteins were detected by immunoblot.  $\alpha$ -Tubulin is shown as a loading control. Mean values, standard errors, and statistical analyses were derived from replicates within one experiment and are representative of 2 independent experiments. NS=not significant.
